# Supplementary material for: Microbubbles decorated with dendronized magnetic nanoparticles for biomedical imaging: effective stabilization via fluorous interactions
Source: publisher site journal article supplement (doi:10.3762/bjnano.10.205), 2019-10-31
Supplement: Additional file 1 [file 2190-4286-10-205-S1.pdf]

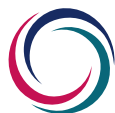

## Supporting Information

for

### **Microbubbles decorated with dendronized magnetic nanoparticles for biomedical imaging: effective stabilization via fluororous interactions**

Da Shi, Justine Wallyn, Dinh-Vu Nguyen, Francis Perton, Delphine Felder-Flesch, Sylvie Bégin-Colin, Mounir Maaloum and Marie Pierre Krafft

*Beilstein J. Nanotechnol.* **2019**, *10*, 2103–2115. doi:10.3762/bjnano.10.205

## Additional spectra

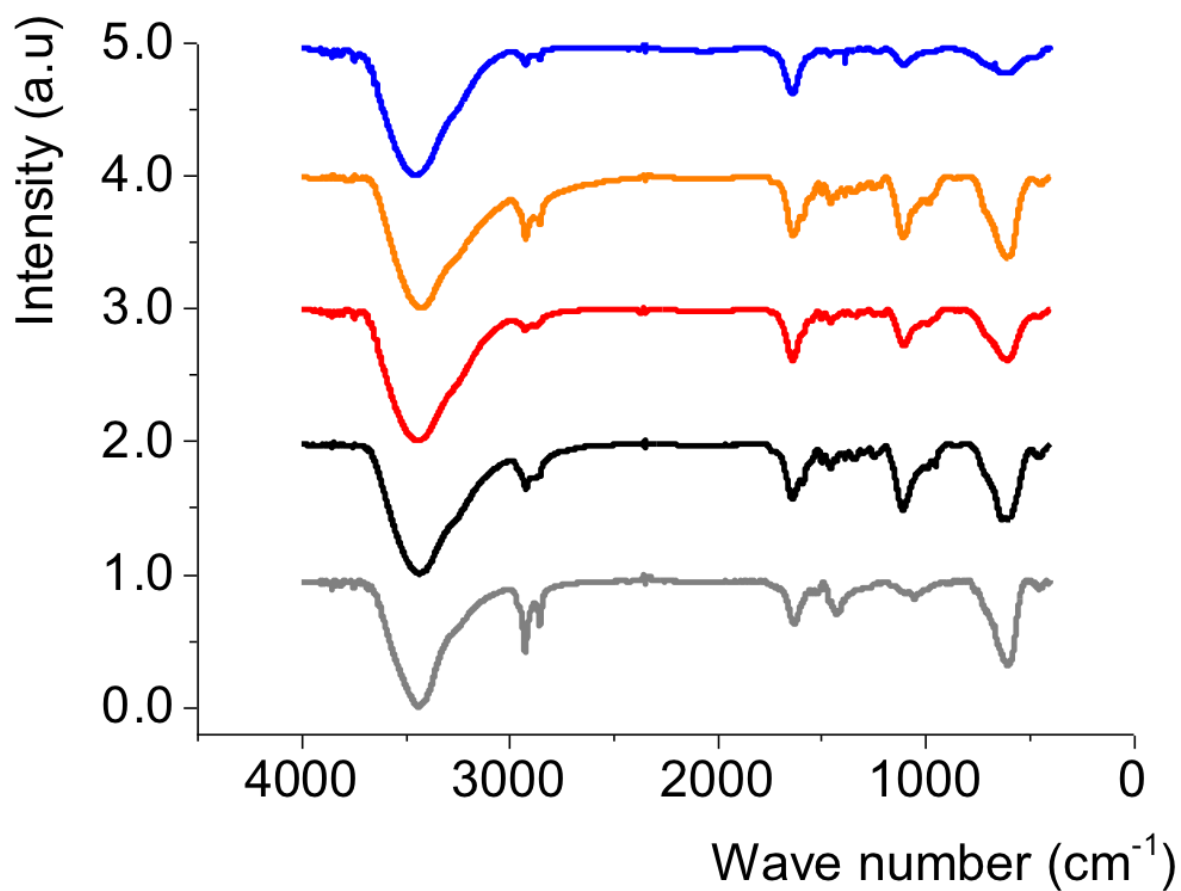

**Figure S1:** Infrared spectra of IONPs covered by oleic acid (grey), or dendronized with C<sub>2</sub>H<sub>5</sub>OEG<sub>8</sub>Den (black), C<sub>2</sub>F<sub>5</sub>OEG<sub>8</sub>Den (red), C<sub>4</sub>H<sub>9</sub>OEG<sub>8</sub>Den (orange) and C<sub>4</sub>F<sub>9</sub>OEG<sub>8</sub>Den (blue).

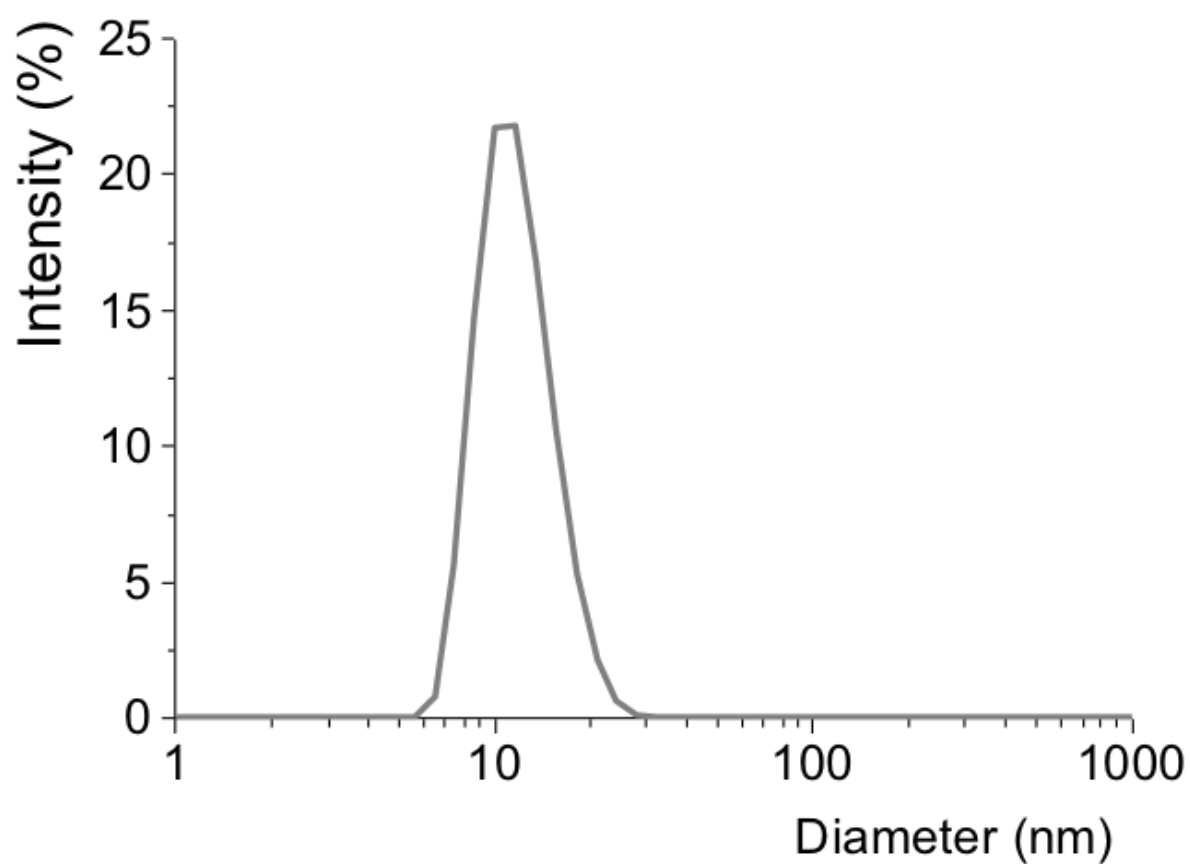

**Figure S2:** Hydrodynamic diameter distributions of IONPs covered with oleic acid ( $10 \pm 1$  nm), in suspension in THF aqueous dispersions ( $0.05 \text{ mg mL}^{-1}$ ).

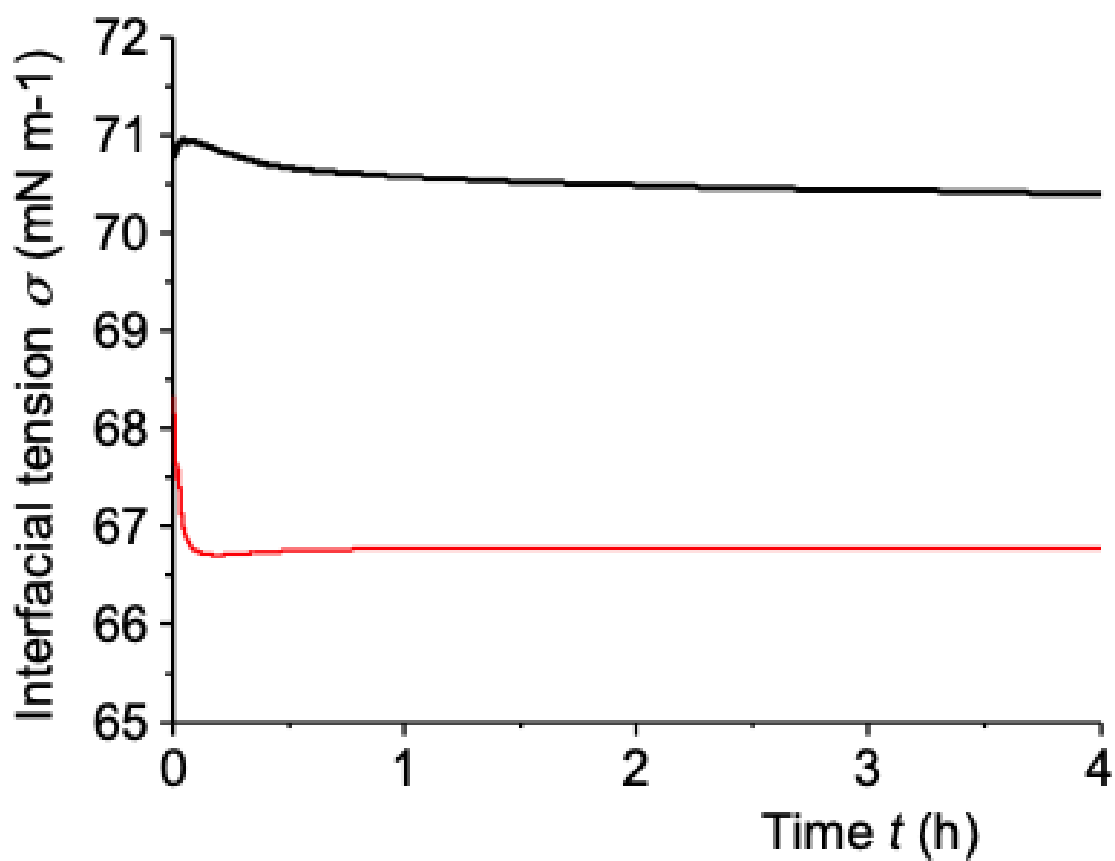

**Figure S3:** Variation of the interfacial tension  $\sigma$  of the gas/aqueous phase interface as a function of time under air (black) and under *F*-hexane-saturated air (red). Temperature was 25 °C.
